# Supplementary material for: Creating a Sport and Exercise Medicine Masters syllabus for doctors: a Delphi study
Source: HighWire-hosted journal article supplement (doi:10.1136/bmjsem-2021-001252), 2022-04-01
Supplement: bmjsem-2021-001252supp001_data_supplement.pdf [file bmjsem-2021-001252supp001_data_supplement.pdf]

## Syllabus for doctors on Postgraduate SEM Masters courses

| <b>1. Physical Activity and Human Health</b> |                                                                                                                                                                                                                                                                                                                                                                                                                                               |
|----------------------------------------------|-----------------------------------------------------------------------------------------------------------------------------------------------------------------------------------------------------------------------------------------------------------------------------------------------------------------------------------------------------------------------------------------------------------------------------------------------|
|                                              | Demonstrate an understanding of the role of physical activity in the prevention and treatment of common long-term health conditions                                                                                                                                                                                                                                                                                                           |
|                                              | Advise on and promote population health through physical activity                                                                                                                                                                                                                                                                                                                                                                             |
|                                              | Make use of physical activity guidelines and recommendations in practice                                                                                                                                                                                                                                                                                                                                                                      |
|                                              | Analyse current UK screening programmes to promote health                                                                                                                                                                                                                                                                                                                                                                                     |
|                                              | Analyse key national and international physical activity resources available to patients and clinicians                                                                                                                                                                                                                                                                                                                                       |
|                                              | Discuss how to overcome the following barriers to physical activity: environmental, social, physical, cultural, religious and psychological                                                                                                                                                                                                                                                                                                   |
|                                              | Demonstrate the ability to prescribe physical activity in healthy individuals and also individuals with disease                                                                                                                                                                                                                                                                                                                               |
|                                              | Critically apply physical activity guidelines in both the prevention and management of chronic disease                                                                                                                                                                                                                                                                                                                                        |
|                                              | Design a physical activity programme for a variety of special populations (e.g. older adults, pregnancy, disability, children)                                                                                                                                                                                                                                                                                                                |
|                                              | Analyse and overcome factors that may impact physical activity prescribing                                                                                                                                                                                                                                                                                                                                                                    |
|                                              | Recognise the importance of communicating the physical activity message beyond the individual                                                                                                                                                                                                                                                                                                                                                 |
|                                              | Demonstrate an understanding of public health policy development and implementation in relation to physical activity and health                                                                                                                                                                                                                                                                                                               |
|                                              | Understand and promote integrated sport and physical activity opportunities for school aged children and adolescents in order to promote a lifelong relationship with physical activity                                                                                                                                                                                                                                                       |
| <b>2. Medical Issues Related to Exercise</b> |                                                                                                                                                                                                                                                                                                                                                                                                                                               |
|                                              | Discuss aspects of the following including aetiology, epidemiology, clinical features, investigation, management and prognosis in relation to physical activity:<br><br>Neurological conditions                                                                                                                                                                                                                                               |
|                                              | Discuss aspects of the following including aetiology, epidemiology, clinical features, investigation, management and prognosis in relation to physical activity:<br><br>Respiratory conditions including:<br>Asthma - Chronic Obstructive Pulmonary Disease - Exercise Induced Laryngeal Obstruction - Exercise Induced Bronchospasm                                                                                                          |
|                                              | Discuss aspects of the following including aetiology, epidemiology, clinical features, investigation, management and prognosis in relation to physical activity:<br><br>Common infectious diseases                                                                                                                                                                                                                                            |
|                                              | Discuss aspects of the following including aetiology, epidemiology, clinical features, investigation, management and prognosis in relation to physical activity:<br><br>Cardiovascular conditions including:<br>HOCM and other cardiomyopathies – Structural abnormalities – Arrhythmias – Valvular disease – Hypercholesterolaemia – Hypertension – Ischaemic heart disease - Heart failure - Inherited channelopathies - Congenital disease |
|                                              | Discuss aspects of the following including aetiology, epidemiology, clinical features, investigation, management and prognosis in relation to physical activity:<br><br>Common gastrointestinal conditions                                                                                                                                                                                                                                    |

## Syllabus for doctors on Postgraduate SEM Masters courses

|                                                                                                                                                                                                                                                                                                                                                                         |
|-------------------------------------------------------------------------------------------------------------------------------------------------------------------------------------------------------------------------------------------------------------------------------------------------------------------------------------------------------------------------|
| Discuss aspects of the following including aetiology, epidemiology, clinical features, investigation, management and prognosis in relation to physical activity:<br><br>Common renal and urogenital conditions                                                                                                                                                          |
| Discuss aspects of the following including aetiology, epidemiology, clinical features, investigation, management and prognosis in relation to physical activity:<br><br>Metabolic conditions including:<br>Diabetes – Thyroid disease – Obesity                                                                                                                         |
| Discuss aspects of the following including aetiology, epidemiology, clinical features, investigation, management and prognosis in relation to physical activity:<br><br>Common ENT conditions                                                                                                                                                                           |
| Discuss aspects of the following including aetiology, epidemiology, clinical features, investigation, management and prognosis in relation to physical activity:<br><br>Common immunological conditions                                                                                                                                                                 |
| Discuss aspects of the following including aetiology, epidemiology, clinical features, investigation, management and prognosis in relation to physical activity:<br><br>Common haematological conditions                                                                                                                                                                |
| Discuss aspects of the following including aetiology, epidemiology, clinical features, investigation, management and prognosis in relation to physical activity:<br><br>Common dermatological conditions                                                                                                                                                                |
| Discuss aspects of the following including aetiology, epidemiology, clinical features, investigation, management and prognosis in relation to physical activity:<br>Rheumatological conditions including:<br>Inflammatory and seronegative arthritis, Osteoarthritis, Fibromyalgia and chronic pain, Connective tissue disorders, Hypermobility syndromes, Osteoporosis |
| Discuss aspects of the following including aetiology, epidemiology, clinical features, investigation, management and prognosis in relation to physical activity:<br><br>Psychological and mental health conditions including:<br>Eating and body perception disorders in the developing athlete - Anxiety - Depression – Stress - Trauma                                |
| Discuss aspects of the following including aetiology, epidemiology, clinical features, investigation, management and prognosis in relation to physical activity:<br><br>Adult musculoskeletal conditions including:<br>Acute pain - Acute musculoskeletal conditions - Chronic pain - Chronic musculoskeletal conditions                                                |
| Discuss aspects of the following including aetiology, epidemiology, clinical features, investigation, management and prognosis in relation to physical activity:<br><br>Paediatric musculoskeletal conditions including:<br>Fractures - Ligamentous injuries and complications - Apophyseal injuries -                                                                  |

## Syllabus for doctors on Postgraduate SEM Masters courses

|                                   |                                                                                                                                                                                                                                                        |
|-----------------------------------|--------------------------------------------------------------------------------------------------------------------------------------------------------------------------------------------------------------------------------------------------------|
|                                   | Overuse injuries - Growth plate stress - Osteochondritis dissecans - Snapping hip - Shoulder instability - Patella instability - SUFE - Perthes - Scoliosis - Talipes - Flexible pes planus - Chest wall deformities - Timings of growth plate closure |
|                                   | Demonstrate the ability to deliver age appropriate injury rehabilitation programmes illustrating understanding of the biomechanical principles underpinning the individuals' chosen activity                                                           |
| <b>3. Injuries Related to SEM</b> |                                                                                                                                                                                                                                                        |
|                                   | Apply the principles of prevention, diagnosis, and treatment of injuries related to sports and physical activity                                                                                                                                       |
|                                   | Analyse management plans for optimal treatment of patients across the spectrum of musculoskeletal problems in accordance with latest guidelines and best practice, and involving other allied health professionals where appropriate                   |
|                                   | Apply knowledge of the pathophysiology of tissue injury and subsequent clinical symptoms and presentations of musculoskeletal disease to the management and rehabilitations of a range of common presentations                                         |
|                                   | Analyse the evidence-based management of common head and neck injuries                                                                                                                                                                                 |
|                                   | Analyse the evidence-based management of common upper limb injuries                                                                                                                                                                                    |
|                                   | Analyse the evidence-based management of common trunk, abdominal and thoracic spinal injuries                                                                                                                                                          |
|                                   | Analyse the evidence-based management of common lumbar spine and pelvic injuries                                                                                                                                                                       |
|                                   | Analyse the evidence-based management of common lower limb injuries including:<br>Tendinopathies - Ligament injuries - Avulsion injuries - Dislocation - Fracture management Other common soft tissue injuries                                         |
|                                   | Recognise red flags which may indicate malignancy or infection                                                                                                                                                                                         |
|                                   | Interpret the findings of radiological and other relevant investigations to determine differential diagnoses                                                                                                                                           |
|                                   | Apply the principles of biomechanics to different sporting and physical activities and in the context of injury                                                                                                                                        |
|                                   | Recognise the role of physical activity in rehabilitation                                                                                                                                                                                              |
|                                   | Devise a rehabilitation programme in relation to common sports injuries                                                                                                                                                                                |
|                                   | Analyse the role of surgery in the management of common sports injuries                                                                                                                                                                                |
|                                   | Analyse rehabilitation progression and return to activity factors when managing common musculoskeletal conditions                                                                                                                                      |
|                                   | Be able to interpret human movement analysis - basic kinematics and kinetics                                                                                                                                                                           |
|                                   | Explain the role of biomechanical analysis of sport specific techniques in the management of sports related injuries                                                                                                                                   |
|                                   | Analyse the effects of variations in biomechanics and the influence of posture on common musculoskeletal presentations                                                                                                                                 |
|                                   | Analyse the role of orthotics in the management of common sports injuries                                                                                                                                                                              |
|                                   | Recognise the role of splinting, bracing and taping techniques                                                                                                                                                                                         |
|                                   | Apply an understanding of level 3 safeguarding knowledge to a range of hypothetical or retrospective cases                                                                                                                                             |
|                                   | Discuss the relevance of common radiological investigations including the suitability of each modality for a range of contexts                                                                                                                         |
| <b>4. Basic Science in SEM</b>    |                                                                                                                                                                                                                                                        |
|                                   | Analyse the principles of exercise physiology including: types of physical activity, effects of physical activity and maximising adaptations to sport and physical activity                                                                            |

## Syllabus for doctors on Postgraduate SEM Masters courses

|                                            |                                                                                                                                                      |
|--------------------------------------------|------------------------------------------------------------------------------------------------------------------------------------------------------|
|                                            | Discuss the principles of body morphology in the context of sport and physical activity                                                              |
|                                            | Apply the key principles of sports psychology to sport and physical activity                                                                         |
|                                            | Analyse the impact of common diseases and medications on normal exercise physiology                                                                  |
|                                            | Describe clinically relevant regional anatomy including normal variations                                                                            |
|                                            | Describe the anatomy of joints and musculo-tendinous units                                                                                           |
|                                            | Describe the characteristics of bone, tendon, ligament, articular cartilage and muscle                                                               |
|                                            | Apply anatomical knowledge to history taking, physical examination and imaging                                                                       |
|                                            | Describe cellular metabolism and biomechanical pathways of energy production                                                                         |
|                                            | Apply the principles of strength and conditioning to formulate a basic plan                                                                          |
|                                            | Undertake appropriate assessments of fitness                                                                                                         |
|                                            | Discuss energy release from various sources including fats, carbohydrates, proteins                                                                  |
|                                            | Discuss physiological responses and adaptations to exercise                                                                                          |
|                                            | Discuss the role of genetics in sport and physical activity                                                                                          |
|                                            | Discuss the role of macro and micronutrients                                                                                                         |
|                                            | Discuss the key principles of hydration in sport and physical activity                                                                               |
|                                            | Discuss the benefits and risks of nutritional supplements in sport and physical activity                                                             |
|                                            | Discuss the effects of alcohol on performance                                                                                                        |
| <b>5. Clinical Pharmacology</b>            |                                                                                                                                                      |
|                                            | Discuss the issues of medication abuse in elite athletes                                                                                             |
|                                            | Discuss the influence of medications used in the treatment of disease on physical activity capacity                                                  |
|                                            | Discuss medication and exercise interactions which may cause or worsen disease                                                                       |
|                                            | Prescribe safely by considering, contraindications, side effects, drug interactions and dosage of commonly used drugs in sport and physical activity |
|                                            | Discuss the regulations regarding travelling with medicines                                                                                          |
|                                            | Discuss the governance of medicine storage and management systems                                                                                    |
| <b>6. Antidoping</b>                       |                                                                                                                                                      |
|                                            | Apply knowledge of the WADA prohibited list in both practice and hypothetical scenarios                                                              |
|                                            | Understand the WADA therapeutic use exemption process                                                                                                |
|                                            | Detail the consequences of doping: health risks, sanctions and responsibilities                                                                      |
|                                            | Recognise suitable resources and tools to support athletes and clinicians regarding medications and anti-doping                                      |
| <b>7. Sports Team and Event Management</b> |                                                                                                                                                      |
|                                            | Describe the roles of the SEM physician in the team environment                                                                                      |
|                                            | Describe the features of good team dynamics                                                                                                          |
|                                            | Describe the role of the main organisations of sport, sports medicine and health promotion at a national and international level                     |
|                                            | Discuss the relevant medical codes on the ethical treatment of athletes (e.g. Olympic code, FSEM code)                                               |
|                                            | Analyse the components and processes of pre-participation screening for athletes and event participants                                              |
|                                            | Discuss the key components of pre-season and pre event medical organisation                                                                          |
|                                            | Analyse the recognition and management of disordered eating and RED-S                                                                                |

## Syllabus for doctors on Postgraduate SEM Masters courses

|                                                                                                                                                                            |
|----------------------------------------------------------------------------------------------------------------------------------------------------------------------------|
| Discuss the equipment, medical supplies and facilities required for team and event care                                                                                    |
| Perform risk assessments of training and competition venues                                                                                                                |
| Discuss common match and event day medical issues                                                                                                                          |
| Demonstrate the on-field assessment and management of sports injuries and medical conditions                                                                               |
| Discuss the psychological aspects of motivation, arousal and performance                                                                                                   |
| Discuss a range of common ethical issues in a team sport environment                                                                                                       |
| Recognise the key medicolegal requirements and considerations in team medicine                                                                                             |
| Discuss aspects including aetiology, epidemiology, clinical features, investigation, management and prognosis of the following in relation to sport and physical activity: |
| Cardiorespiratory arrest                                                                                                                                                   |
| Discuss aspects including aetiology, epidemiology, clinical features, investigation, management and prognosis of the following in relation to sport and physical activity: |
| Sudden death in sport, both cardiac and traumatic causes                                                                                                                   |
| Discuss aspects including aetiology, epidemiology, clinical features, investigation, management and prognosis of the following in relation to sport and physical activity: |
| Concussion and head injury                                                                                                                                                 |
| Discuss aspects including aetiology, epidemiology, clinical features, investigation, management and prognosis of the following in relation to sport and physical activity: |
| Acute musculoskeletal and soft tissue injuries                                                                                                                             |
| Discuss aspects including aetiology, epidemiology, clinical features, investigation, management and prognosis of the following in relation to sport and physical activity: |
| Basic management of fracture and dislocations                                                                                                                              |
| Discuss aspects including aetiology, epidemiology, clinical features, investigation, management and prognosis of the following in relation to sport and physical activity: |
| The acutely unwell patient                                                                                                                                                 |
| Discuss aspects including aetiology, epidemiology, clinical features, investigation, management and prognosis of the following in relation to sport and physical activity: |
| Eye and ENT emergencies                                                                                                                                                    |
| Apply the principles of pre-hospital care to a range of common sport and physical activity emergencies                                                                     |
| Demonstrate simple skin closure and suturing and have an awareness of the indications for each                                                                             |
| Demonstrate basic airway management and deliver effective resuscitation                                                                                                    |
| Demonstrate defibrillation and cardiorespiratory resuscitation                                                                                                             |
| Advise on screening programmes to detect those at risk of sudden death in sport                                                                                            |

## Syllabus for doctors on Postgraduate SEM Masters courses

|                                                         |                                                                                                                                                                                                                                                                                               |
|---------------------------------------------------------|-----------------------------------------------------------------------------------------------------------------------------------------------------------------------------------------------------------------------------------------------------------------------------------------------|
|                                                         | Discuss the findings of any abnormalities raised during screening with athletes, family members and carers                                                                                                                                                                                    |
|                                                         | Demonstrate prompt assessment of the acutely deteriorating patient, including those who are shocked or unconscious, and deliver appropriate, evidence-based care                                                                                                                              |
| <b>8. Physical Activity in Challenging Environments</b> |                                                                                                                                                                                                                                                                                               |
|                                                         | Be able to manage common issues in SEM relating to physical activity in extreme environments including: cold environments, hot environments and altitude (                                                                                                                                    |
| <b>9. Specific Groups in SEM</b>                        |                                                                                                                                                                                                                                                                                               |
|                                                         | Be able to manage issues in SEM relating to specific groups of athletes in sport including: paediatric, female, ageing, adventure sports and athletes with a disability                                                                                                                       |
|                                                         | Apply the effects of the ageing process when providing physical activity advice                                                                                                                                                                                                               |
|                                                         | Apply knowledge of the physiological changes during and after pregnancy when providing physical activity advice to pregnant and post-partum individuals                                                                                                                                       |
|                                                         | Demonstrate the ability to advise women on undertaking safe exercise throughout the lifespan including advising on energy balance, bone health and hormonal influences                                                                                                                        |
|                                                         | Discuss the management of common issues affecting disabled athletes and exercisers in relation to sports and physical activity                                                                                                                                                                |
|                                                         | Discuss physical problems experienced by amputees and wheelchair users with everyday living and with respect to sport                                                                                                                                                                         |
|                                                         | Discuss contraception options in athletes                                                                                                                                                                                                                                                     |
|                                                         | Demonstrates an awareness of the unique needs of patients with disabilities, the barriers faced in participating in physical exercise and the ability to advise those with disabilities how to undertake safe exercise                                                                        |
|                                                         | Understanding the social, psychological religious and cultural factors that influence physical activity participation and demonstrate initiatives to overcome these                                                                                                                           |
|                                                         | Demonstrates knowledge of the anatomical, physiological, psychosocial, sexual and educational development of children and adolescents in the management of musculoskeletal conditions                                                                                                         |
|                                                         | Demonstrates knowledge of the aspects that enhance care during the transition and transfer between paediatric and adult services across healthcare                                                                                                                                            |
| <b>10. Intrinsic Skills of a SEM Clinician</b>          |                                                                                                                                                                                                                                                                                               |
|                                                         | Demonstrate the following skills commonly used in practice by SEM physicians:<br><br>Communication - Collaboration - Leadership and management - Health advocacy - Safety - Research - Teaching - Learning - Professionalism -Consideration of ethics, cultural religious and LGBTQ awareness |
|                                                         | Demonstrate the ability to work within a multidisciplinary team                                                                                                                                                                                                                               |
|                                                         | Demonstrate the need to coordinate care across multiple agencies to address physical, psychological and social needs in community, secondary care, recreational and elite sporting environments                                                                                               |
| <b>11. Extrinsic Skills of a SEM Clinician</b>          |                                                                                                                                                                                                                                                                                               |
|                                                         | Perform a comprehensive examination of the musculoskeletal and neurological systems and interpret the findings sufficiently to develop a clinically reasoned diagnosis and management plan                                                                                                    |
|                                                         | Perform a sport-specific medical and musculoskeletal screening examination                                                                                                                                                                                                                    |

## Syllabus for doctors on Postgraduate SEM Masters courses

|                                                                                                                       |
|-----------------------------------------------------------------------------------------------------------------------|
| Provide safe and effective immediate medical care for on-field injuries and medical events                            |
| Perform concussion screening examinations, baseline and postinjury, and interpret the results                         |
| Recognise the indications of a range of radiological and other investigations relating to sport and physical activity |
| Analyse ECG findings in an athlete and recognise the indications for onward referral                                  |
| Discuss the indications, benefits and risks of a variety of common joint and soft tissue injections                   |
| Have an understanding of the role of a range of commonly used protective braces                                       |
| Recognise the indications for taping joints, tendons and muscles and its role in injury prevention and treatment      |
| Interpret simple video analysis of a variety of sporting skills including running gait                                |
| Analyse the indications for and findings of resting and exercise lung function tests                                  |
